# Supplementary material
Source: Research Square preprint supplement (doi:10.21203/rs.3.rs-8658846/v1)
Supplement: Supplementary file 2 [file d6dac08585a91002fe2bdeb9.docx]

QUESTIONNAIRE (SLIC-T2D TRIAL)

SECTION A: SOCIO-DEMOGRAPHIC DATA AND CLINICAL CHARACTERISTICS ENGLISH VERSION.

1. Serial Number / 2-Telephone numbers
2. Date………………………
3. Name (initials) …...…………..
4. Age (in years)………………
5. Sex (a) Male (b) Female
6. Residence……a) urban b) Rural
7. Occupation………………………………
8. Employment status………………………
9. Marital Status (a) Single (b) Married c) divorced d) widowed e) separated
10. Religion: (a) Islam (b) Christianity (c) Traditional (d) Any other specify………………
11. Tribe (a) Hausa (b) Fulani (c) Yoruba ( d) Igbo (5) Other specify…………………..
12. Highest educational level (a) None (b) Qur’anic (c) Primary (d) Secondary (e) Tertiary
13. Family type: a) Monogamous b) Polygamous
14. Comorbidity:

Hypertension a) Present b) Absent

Obesity a) Present b) Absent

Dyslipidaemia a) Present b) Absent

Asthma a) present b) absent

Renal disease a) Present b) Absent

HIV/AIDS a) Present b) Absent

Cancers a) Present b) Absent

Hepatitis B a) Present b) Absent

Mental illness a) present b) Absent

Heart failure a) Present b) Absent

Cardiomyopathies a) Present b) Absent

Dermatological disorder a) Present b) Absent

Others………………………….

1. Family history of DM a) Present b) Absent
2. Systolic blood pressure in mmhg
3. Diastolic blood pressure in mmhg
4. Weight…………………….
5. Height……………………..
6. Body mass index……………..
7. SECTION B: BIOCHEMICAL PARAMETERS
8. HbA1c (%)………………………
9. Fasting blood sugar (Mmol/l)…………………

SECTION C: LIFESTYLE PRACTICES

20. Physical Activity per week for Age ≥18years (a) <150 minutes/week (b) ≥150 minutes/week (c) none

21. Vegetables consumption per day in a typical week (a) 1- 2 servings (b) >2 servings (c) none

22. Fruits eating per day in a typical week (a) 1-2 servings b) >2 serving (c) none


23. Fast food consumption per day during the past 7 days (a) 1-2 servings (b)> 2 servings

(c) None

24. Consumption of carbonated soft drinks in a usual day (a) 1-2 times (b) >2times

25. Tobacco use (smoking) (a) smoker (b) non-smoker

26. Drinking of alcohol (a) yes (b) no

27. Healthy Behaviours Score (HBS) for lifestyle practices

## TABLE 1: HBS FOR LIFESTYLE PRACTICES

| HEALTH BEHAVIOUR SCORE (HBS) |
| --- |
| Total score of ≥3= healthy behaviour  Range of score= 1 - 4  Score ≤ 2 = unhealthy lifestyle behaviour |

| LIFESTYLE PRACTICES | Yes | No |
| --- | --- | --- |
| Smoking | 0 | 1 |
| Alcohol ingestion | 0 | 1 |
| Fruits/vegetable/snacks | 0 with snacks | 1 |
| Physical activity | 0 inactivity | 1 activity |

TOTAL 0 4
